# Supplementary material for: Epidemiology and genetic determination of measures of peripheral vascular health in the Long Life Family Study
Source: publisher site journal article supplement (doi:10.18632/aging.206204), 2025-02-25
Supplement: Supplementary file [file aging-v17i2-206204-supplementary-material-SD2.pdf]

## SUPPLEMENTARY TABLE

**Supplementary Table 1. Distribution of peripheral vascular health measures in the LLFS.**

|            | <b>Overall<br/>(N = 3006)</b> | <b>Proband generation<br/>(N = 1090)</b> | <b>Offspring<br/>(N = 1554)</b> | <b>Spousal controls<br/>(N = 362)</b> | <b>P-value for offspring v.<br/>spousal controls<sup>a</sup></b> |
|------------|-------------------------------|------------------------------------------|---------------------------------|---------------------------------------|------------------------------------------------------------------|
| Median ABI | 1.16                          | 1.10                                     | 1.19                            | 1.20                                  | 0.538                                                            |
| PAD (%)    | 7.4                           | 18.2                                     | 1.0                             | 1.9                                   | 0.541                                                            |

<sup>a</sup>Adjusted for age, sex, and field centers. Mean age (range) of offspring was 60.1 (30–87) years and spousal controls was 60.9 (24–83) years (*P* for difference = 0.07). Offspring were 60.1% female, while spousal controls were 48.3% (*P* for difference < 0.0001).
